# Supplementary material
Source: Springer Nature journal article supplement (https://www.springermedizin.de/resource/supplementary/12884_2013_1129_MOESM1_ESM.pdf/9458998)
Supplement: MOESM1 [file 9458998]

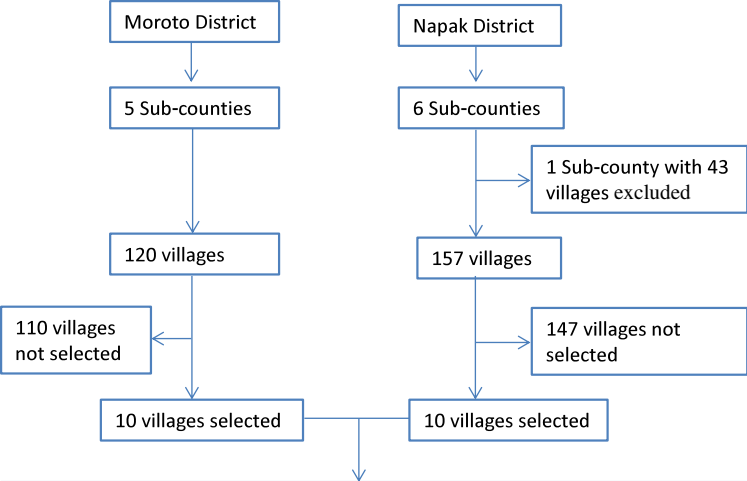

### Characteristics of villages

- Distance from all season main road: 8 > 2 km ; 12 ≤ 2 km
- Location: 18 rural; 2 urban
- Distance to nearest health facility: 2 > 5 km; 18 ≤ 5 km
- Terrain: 6 mountainous; 14 flat
- Main source of livelihood: 14 pastoralism/subsistence farming; 2 mainly subsistence farming; 4 trade/employment
- Accessibility: 14 accessible all year round; 6 inaccessible in rainy season
